# Supplementary material for: A covalently crosslinked silk fibroin hydrogel using enzymatic oxidation and chemoenzymatically synthesized copolypeptide crosslinkers consisting of a GPG tripeptide motif and tyrosine: control of gelation and resilience
Source: Royal Society of Chemistry journal article supplement (doi:10.1039/d0py00187b), 2020-01-01
Supplement: d0py00187b1.pdf [file d0py00187b1.pdf]

**Electronic Supplementary Information**

**A covalently crosslinked silk fibroin hydrogel using enzymatic oxidation and chemoenzymatically synthesized copolypeptide crosslinkers consisting of a GPG tripeptide motif and tyrosine: control of gelation and resilience**

Hiromitsu Sogawa<sup>1,\*</sup>, Takuya Katashima<sup>1</sup>, and Keiji Numata<sup>1,\*</sup>

<sup>1</sup>Biomacromolecules Research Team, RIKEN Center for Sustainable Resource Science, 2-1, Hirosawa, Wako-shi, Saitama, 351-0198

\*Corresponding Author. E-mail: hiromitsu.sogawa@riken.jp, keiji.numata@riken.jp

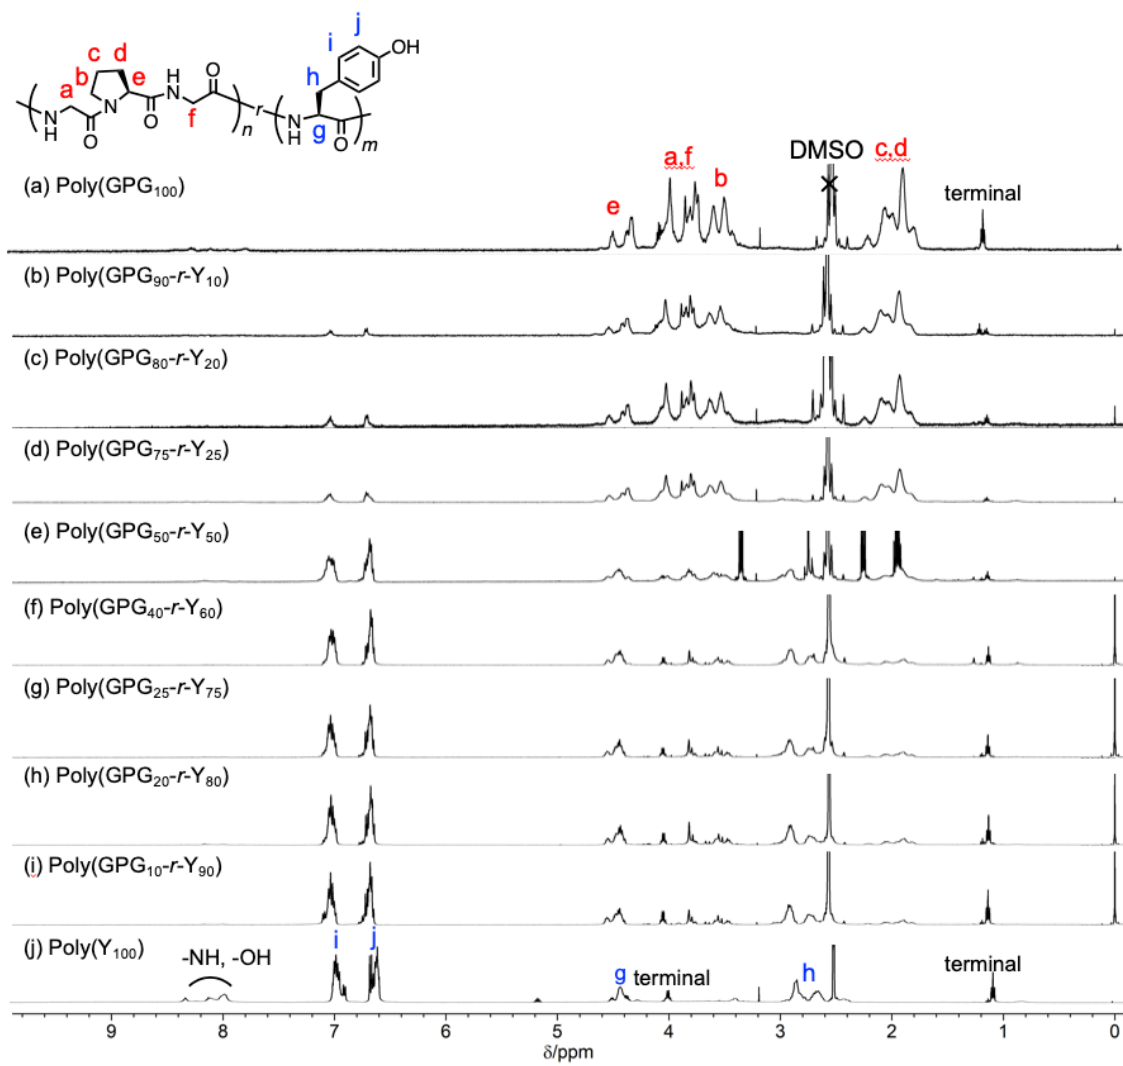

**Figure S1.**  $^1\text{H}$  NMR spectra of poly(GPG<sub>*n*</sub>-*r*-Y<sub>*m*</sub>) (500 MHz, 298 K, DMSO-*d*<sub>6</sub>/TFA-*d* = 5/1 (v/v)).

(a) Poly(GPG<sub>100</sub>)

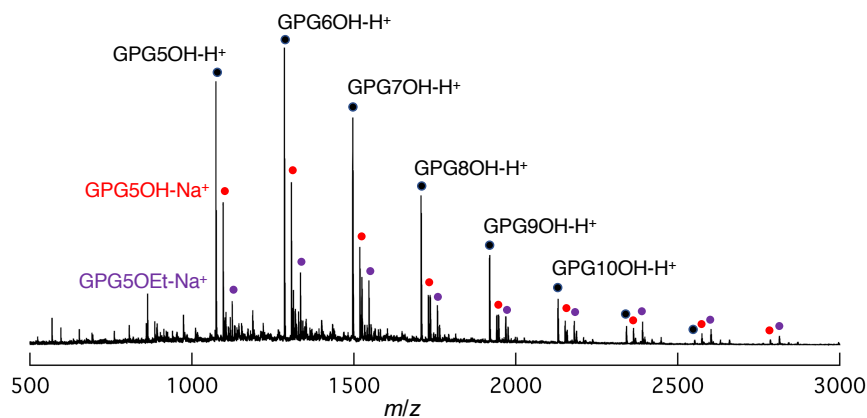

R = H, Additive: H<sup>+</sup> (●)

| n     | 5                     | 6                     | 7                     | 8                     |
|-------|-----------------------|-----------------------|-----------------------|-----------------------|
| code  | GPG5OH-H <sup>+</sup> | GPG6OH-H <sup>+</sup> | GPG7OH-H <sup>+</sup> | GPG8OH-H <sup>+</sup> |
| Theo. | 1074.75               | 1285.66               | 1496.77               | 1707.88               |
| Obsd. | 1074.20               | 1285.24               | 1496.29               | 1709.33               |

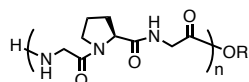

R = H, Additive: Na<sup>+</sup> (●)

| n     | 5                      | 6                      | 7                      | 8                      |
|-------|------------------------|------------------------|------------------------|------------------------|
| code  | GPG5OH-Na <sup>+</sup> | GPG6OH-Na <sup>+</sup> | GPG7OH-Na <sup>+</sup> | GPG8OH-Na <sup>+</sup> |
| Theo. | 1096.54                | 1307.65                | 1518.76                | 1729.87                |
| Obsd. | 1096.17                | 1307.21                | 1518.25                | 1729.29                |

R = C<sub>2</sub>H<sub>5</sub>, Additive: H<sup>+</sup> (●)

| n     | 5                       | 6                       | 7                       | 8                       |
|-------|-------------------------|-------------------------|-------------------------|-------------------------|
| code  | GPG5OEt-Na <sup>+</sup> | GPG6OEt-Na <sup>+</sup> | GPG7OEt-Na <sup>+</sup> | GPG8OEt-Na <sup>+</sup> |
| Theo. | 1124.57                 | 1335.68                 | 1546.79                 | 1757.90                 |
| Obsd. | 1124.19                 | 1335.23                 | 1546.27                 | 1757.35                 |

(b) Poly(GPG<sub>90-r</sub>-Y<sub>10</sub>)

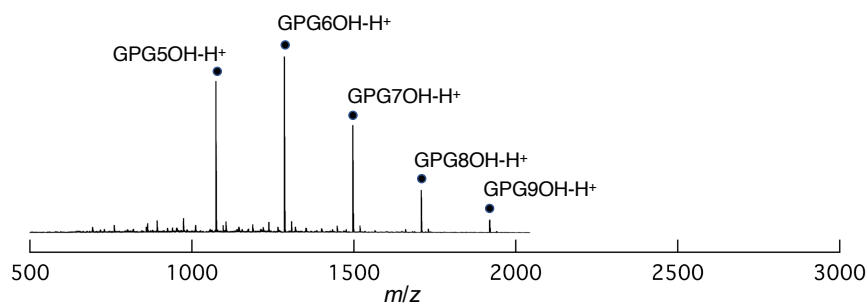

R = H, Additive: H<sup>+</sup> (●)

| n     | 5                     | 6                     | 7                     | 8                     |
|-------|-----------------------|-----------------------|-----------------------|-----------------------|
| code  | GPG5OH-H <sup>+</sup> | GPG6OH-H <sup>+</sup> | GPG7OH-H <sup>+</sup> | GPG8OH-H <sup>+</sup> |
| Theo. | 1074.75               | 1285.66               | 1496.77               | 1707.88               |
| Obsd. | 1074.42               | 1285.51               | 1496.60               | 1707.69               |

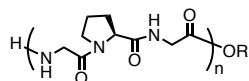

(c) Poly(GPG<sub>80-r</sub>-Y<sub>20</sub>)

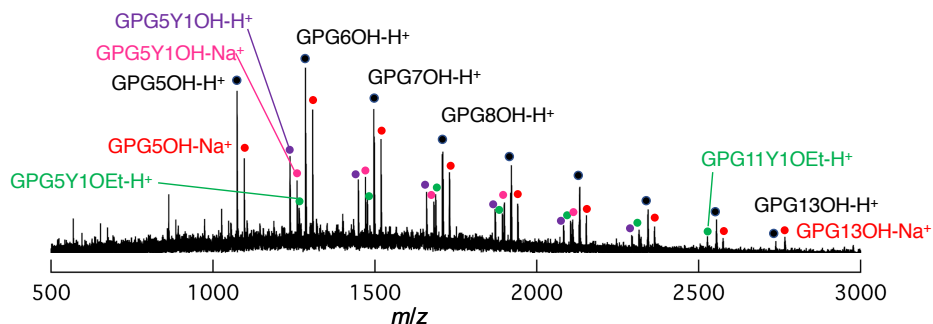

Additive: H<sup>+</sup> (●)

| n     | 5                     | 6                     | 7                     | 8                     |
|-------|-----------------------|-----------------------|-----------------------|-----------------------|
| code  | GPG5OH-H <sup>+</sup> | GPG6OH-H <sup>+</sup> | GPG7OH-H <sup>+</sup> | GPG8OH-H <sup>+</sup> |
| Theo. | 1074.75               | 1285.66               | 1496.77               | 1707.88               |
| Obsd. | 1074.43               | 1285.52               | 1496.61               | 1708.69               |

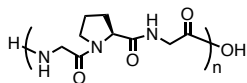

R = H, Additive: Na<sup>+</sup> (●)

| n     | 5                      | 6                      | 7                      | 8                      |
|-------|------------------------|------------------------|------------------------|------------------------|
| code  | GPG5OH-Na <sup>+</sup> | GPG6OH-Na <sup>+</sup> | GPG7OH-Na <sup>+</sup> | GPG8OH-Na <sup>+</sup> |
| Theo. | 1096.54                | 1307.65                | 1518.76                | 1729.87                |
| Obsd. | 1096.36                | 1307.51                | 1518.59                | 1729.67                |

Additive: H<sup>+</sup> (●)

| n     | 5                       | 6                       | 7                       | 8                       |
|-------|-------------------------|-------------------------|-------------------------|-------------------------|
| code  | GPG5Y1OH-H <sup>+</sup> | GPG6Y1OH-H <sup>+</sup> | GPG7Y1OH-H <sup>+</sup> | GPG8Y1OH-H <sup>+</sup> |
| Theo. | 1237.74                 | 1448.85                 | 1659.96                 | 1871.07                 |
| Obsd. | 1237.50                 | 1448.58                 | 1659.66                 | 1870.74                 |

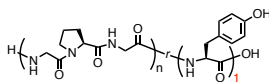

Additive: Na<sup>+</sup> (●)

| n     | 5                        | 6                        | 7                        | 8                        |
|-------|--------------------------|--------------------------|--------------------------|--------------------------|
| code  | GPG5Y1OH-Na <sup>+</sup> | GPG6Y1OH-Na <sup>+</sup> | GPG7Y1OH-Na <sup>+</sup> | GPG8Y1OH-Na <sup>+</sup> |
| Theo. | 1259.73                  | 1470.84                  | 1681.95                  | 1893.06                  |
| Obsd. | 1259.47                  | 1470.56                  | 1681.66                  | 1892.73                  |

Additive: H<sup>+</sup> (●)

| n     | 5                        | 6                        | 7                        | 8                        |
|-------|--------------------------|--------------------------|--------------------------|--------------------------|
| code  | GPG5Y1OEt-H <sup>+</sup> | GPG6Y1OEt-H <sup>+</sup> | GPG7Y1OEt-H <sup>+</sup> | GPG8Y1OEt-H <sup>+</sup> |
| Theo. | 1265.77                  | 1476.78                  | 1687.99                  | 1899.10                  |
| Obsd. | 1265.51                  | 1476.61                  | 1687.69                  | 1898.77                  |

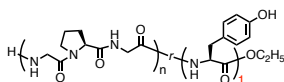

(d) Poly(GPG<sub>75-r</sub>-Y<sub>25</sub>)

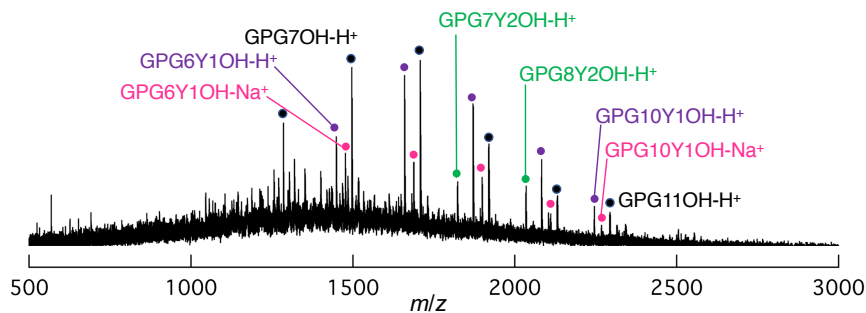

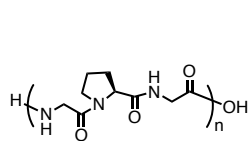

Additive: H<sup>+</sup> (●)

| n     | 6                     | 7                     | 8                     | 9                     |
|-------|-----------------------|-----------------------|-----------------------|-----------------------|
| code  | GPG6OH-H <sup>+</sup> | GPG7OH-H <sup>+</sup> | GPG8OH-H <sup>+</sup> | GPG9OH-H <sup>+</sup> |
| Theo. | 1285.66               | 1496.77               | 1707.88               | 1917.99               |
| Obsd. | 1285.51               | 1496.61               | 1707.68               | 1918.75               |

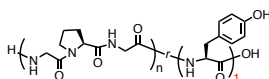

Additive: H<sup>+</sup> (●)

| n     | 6                       | 7                       | 8                       | 9                       |
|-------|-------------------------|-------------------------|-------------------------|-------------------------|
| code  | GPG6Y1OH-H <sup>+</sup> | GPG7Y1OH-H <sup>+</sup> | GPG8Y1OH-H <sup>+</sup> | GPG9Y1OH-H <sup>+</sup> |
| Theo. | 1448.85                 | 1659.96                 | 1871.07                 | 2082.18                 |
| Obsd. | 1448.58                 | 1659.68                 | 1870.74                 | 2081.80                 |

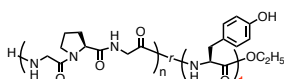

Additive: H<sup>+</sup> (●)

| n     | 6                        | 7                        | 8                        | 9                        |
|-------|--------------------------|--------------------------|--------------------------|--------------------------|
| code  | GPG6Y1OEt-H <sup>+</sup> | GPG7Y1OEt-H <sup>+</sup> | GPG8Y1OEt-H <sup>+</sup> | GPG9Y1OEt-H <sup>+</sup> |
| Theo. | 1476.78                  | 1687.99                  | 1899.10                  | 2110.21                  |
| Obsd. | 1476.61                  | 1687.70                  | 1898.79                  | 2110.87                  |

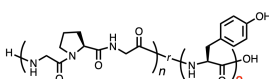

Additive: H<sup>+</sup> (●)

| n     | 7                       | 8                       |
|-------|-------------------------|-------------------------|
| code  | GPG7Y2OH-H <sup>+</sup> | GPG8Y2OH-H <sup>+</sup> |
| Theo. | 1823.15                 | 2034.26                 |
| Obsd. | 1823.69                 | 2033.76                 |

(e) Poly(GPG<sub>50-r</sub>-Y<sub>50</sub>)

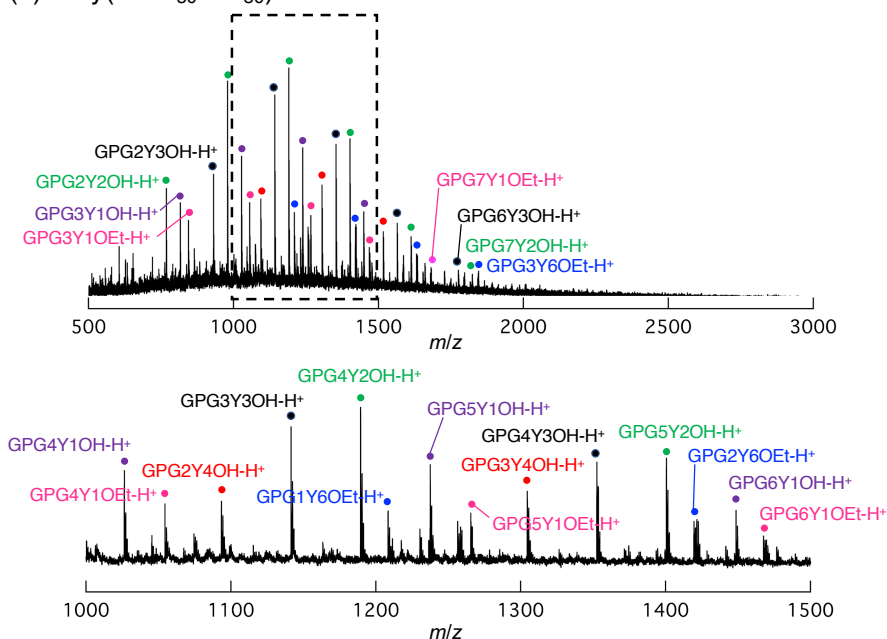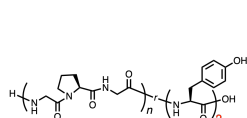

Additive: H<sup>+</sup> (●)

| n     | 2                       | 3                       | 4                       | 5                       |
|-------|-------------------------|-------------------------|-------------------------|-------------------------|
| code  | GPG2Y2OH-H <sup>+</sup> | GPG3Y2OH-H <sup>+</sup> | GPG4Y2OH-H <sup>+</sup> | GPG5Y2OH-H <sup>+</sup> |
| Theo. | 767.60                  | 978.71                  | 1189.82                 | 1400.93                 |
| Obsd. | 767.32                  | 978.40                  | 1189.50                 | 1400.59                 |

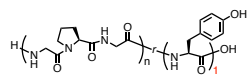

Additive: H<sup>+</sup> (●)

| n     | 3                       | 4                       | 5                       | 6                       |
|-------|-------------------------|-------------------------|-------------------------|-------------------------|
| code  | GPG3Y1OH-H <sup>+</sup> | GPG4Y1OH-H <sup>+</sup> | GPG5Y1OH-H <sup>+</sup> | GPG6Y1OH-H <sup>+</sup> |
| Theo. | 815.52                  | 1026.63                 | 1237.74                 | 1448.85                 |
| Obsd. | 815.34                  | 1026.43                 | 1237.53                 | 1448.62                 |

Chemical structure: 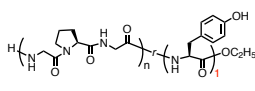

Additive: H<sup>+</sup> (●)

| n     | 3                        | 4                        | 5                        | 6                        |
|-------|--------------------------|--------------------------|--------------------------|--------------------------|
| code  | GPG3Y1OEt-H <sup>+</sup> | GPG4Y1OEt-H <sup>+</sup> | GPG5Y1OEt-H <sup>+</sup> | GPG6Y1OEt-H <sup>+</sup> |
| Theo. | 843.55                   | 1054.66                  | 1265.77                  | 1476.88                  |
| Obsd. | 843.37                   | 1054.46                  | 1265.56                  | 1476.67                  |

Chemical structure: 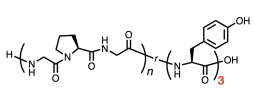

Additive: H<sup>+</sup> (●)

| n     | 2                       | 3                       | 4                       | 5                       |
|-------|-------------------------|-------------------------|-------------------------|-------------------------|
| code  | GPG2Y3OH-H <sup>+</sup> | GPG3Y3OH-H <sup>+</sup> | GPG4Y3OH-H <sup>+</sup> | GPG5Y3OH-H <sup>+</sup> |
| Theo. | 930.79                  | 1141.90                 | 1353.01                 | 1564.12                 |
| Obsd. | 930.37                  | 1141.47                 | 1352.56                 | 1563.65                 |

Chemical structure: 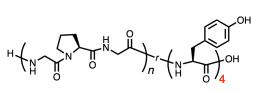

Additive: H<sup>+</sup> (●)

| n     | 2                       | 3                       | 4                       |
|-------|-------------------------|-------------------------|-------------------------|
| code  | GPG2Y4OH-H <sup>+</sup> | GPG3Y4OH-H <sup>+</sup> | GPG4Y4OH-H <sup>+</sup> |
| Theo. | 1093.98                 | 1305.09                 | 1516.20                 |
| Obsd. | 1093.43                 | 1304.53                 | 1515.62                 |

Chemical structure: 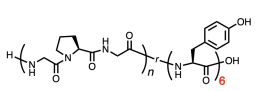

Additive: H<sup>+</sup> (●)

| m     | 2                       | 3                       | 4                       | 5                       |
|-------|-------------------------|-------------------------|-------------------------|-------------------------|
| code  | GPG1Y6OH-H <sup>+</sup> | GPG2Y6OH-H <sup>+</sup> | GPG3Y6OH-H <sup>+</sup> | GPG4Y6OH-H <sup>+</sup> |
| Theo. | 1209.25                 | 1420.36                 | 1631.47                 | 1842.58                 |
| Obsd. | 1208.47                 | 1419.56                 | 1630.65                 | 1842.76                 |

(f) Poly(GPG<sub>40</sub>-*r*-Y<sub>60</sub>)

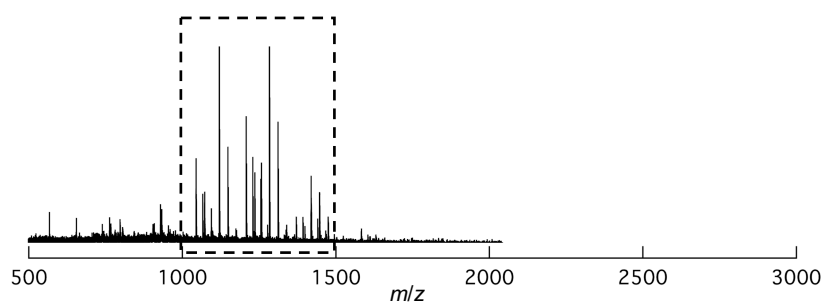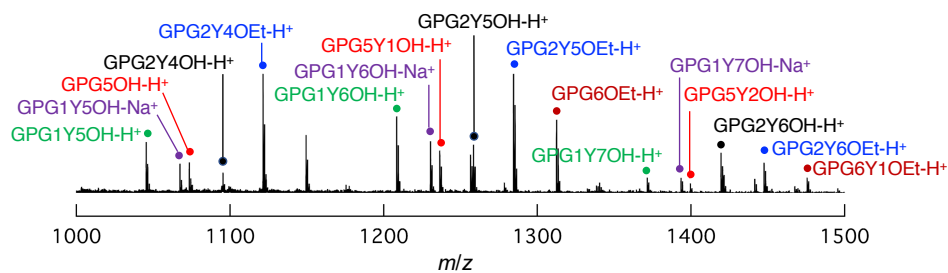

Chemical structure: 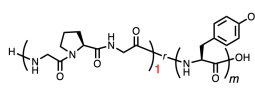

Additive: H<sup>+</sup> (●)

| m     | 5                       | 6                       | 7                       |
|-------|-------------------------|-------------------------|-------------------------|
| code  | GPG1Y5OH-H <sup>+</sup> | GPG1Y6OH-H <sup>+</sup> | GPG1Y7OH-H <sup>+</sup> |
| Theo. | 1046.06                 | 1209.25                 | 1372.44                 |
| Obsd. | 1045.39                 | 1208.46                 | 1371.52                 |

Additive: Na<sup>+</sup> (●)

| n     | 5                        | 6                        | 7                        |
|-------|--------------------------|--------------------------|--------------------------|
| code  | GPG1Y5OH-Na <sup>+</sup> | GPG1Y6OH-Na <sup>+</sup> | GPG1Y7OH-Na <sup>+</sup> |
| Theo. | 1068.05                  | 1231.24                  | 1394.43                  |
| Obsd. | 1067.37                  | 1230.43                  | 1393.49                  |

R = H, Additive: H<sup>+</sup> (●)

| m     | 4                       | 5                       | 6                       |
|-------|-------------------------|-------------------------|-------------------------|
| code  | GPG2Y4OH-H <sup>+</sup> | GPG2Y5OH-H <sup>+</sup> | GPG2Y6OH-H <sup>+</sup> |
| Theo. | 1093.98                 | 1257.17                 | 1420.36                 |
| Obsd. | 1095.42                 | 1256.49                 | 1419.55                 |

R = C<sub>2</sub>H<sub>5</sub>, Additive: H<sup>+</sup> (●)

| n     | 4                        | 5                        | 6                        |
|-------|--------------------------|--------------------------|--------------------------|
| code  | GPG2Y4OEt-H <sup>+</sup> | GPG2Y5OEt-H <sup>+</sup> | GPG2Y6OEt-H <sup>+</sup> |
| Theo. | 1122.01                  | 1285.20                  | 1448.39                  |
| Obsd. | 1121.42                  | 1284.48                  | 1447.56                  |

Additive: H<sup>+</sup> (●)

| m     | 0                     | 1                       | 2                       |
|-------|-----------------------|-------------------------|-------------------------|
| code  | GPG5OH-H <sup>+</sup> | GPG5Y1OH-H <sup>+</sup> | GPG5Y2OH-H <sup>+</sup> |
| Theo. | 1074.55               | 1237.74                 | 1400.93                 |
| Obsd. | 1073.43               | 1236.48                 | 1399.23                 |

Additive: H<sup>+</sup> (●)

| m     | 0                      | 1                        |
|-------|------------------------|--------------------------|
| code  | GPG6OEt-H <sup>+</sup> | GPG6Y1OEt-H <sup>+</sup> |
| Theo. | 1313.69                | 1476.88                  |
| Obsd. | 1312.51                | 1475.57                  |

(g) Poly(GPG<sub>25-r</sub>-Y<sub>75</sub>)

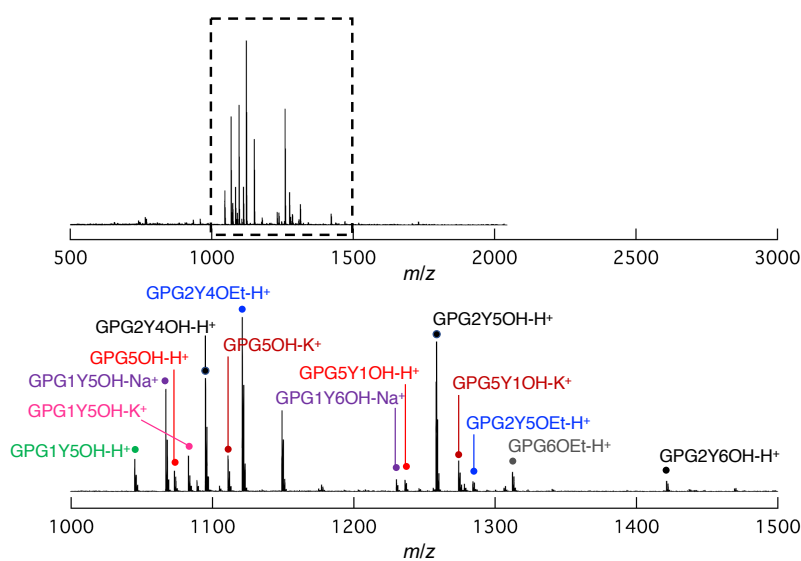

Additive: H<sup>+</sup> (●)

| m     | 5                       |
|-------|-------------------------|
| code  | GPG1Y5OH-H <sup>+</sup> |
| Theo. | 1046.06                 |
| Obsd. | 1045.39                 |

Additive: Na<sup>+</sup> (●)

| n     | 5                        | 6                        |
|-------|--------------------------|--------------------------|
| code  | GPG1Y5OH-Na <sup>+</sup> | GPG1Y6OH-Na <sup>+</sup> |
| Theo. | 1068.05                  | 1231.24                  |
| Obsd. | 1067.37                  | 1230.43                  |

Additive: H<sup>+</sup> (●)

| m     | 5                       |
|-------|-------------------------|
| code  | GPG1Y5OH-K <sup>+</sup> |
| Theo. | 1275.84                 |
| Obsd. | 1274.44                 |

**R = H, Additive: H<sup>+</sup> (●)**

| m     | 4                       | 5                       | 6                       |
|-------|-------------------------|-------------------------|-------------------------|
| code  | GPG2Y4OH-H <sup>+</sup> | GPG2Y5OH-H <sup>+</sup> | GPG2Y6OH-H <sup>+</sup> |
| Theo. | 1093.98                 | 1257.17                 | 1420.36                 |
| Obsd. | 1095.41                 | 1258.46                 | 1421.53                 |

**R = C<sub>2</sub>H<sub>5</sub>, Additive: H<sup>+</sup> (●)**

| n     | 4                        | 5                        |
|-------|--------------------------|--------------------------|
| code  | GPG2Y4OEt-H <sup>+</sup> | GPG2Y5OEt-H <sup>+</sup> |
| Theo. | 1122.01                  | 1285.20                  |
| Obsd. | 1121.42                  | 1284.50                  |

**Additive: H<sup>+</sup> (●)**

| m     | 0                     | 1                       |
|-------|-----------------------|-------------------------|
| code  | GPG5OH-H <sup>+</sup> | GPG5Y1OH-H <sup>+</sup> |
| Theo. | 1074.55               | 1237.74                 |
| Obsd. | 1073.43               | 1236.48                 |

**Additive: K<sup>+</sup> (●)**

| m     | 0                     | 1                       |
|-------|-----------------------|-------------------------|
| code  | GPG5OH-H <sup>+</sup> | GPG5Y1OH-H <sup>+</sup> |
| Theo. | 1112.65               | 1275.84                 |
| Obsd. | 1111.37               | 1274.44                 |

**Additive: H<sup>+</sup> (●)**

| m     | 0                      |
|-------|------------------------|
| code  | GPG6OEt-H <sup>+</sup> |
| Theo. | 1313.69                |
| Obsd. | 1312.51                |

(h) Poly(GPG<sub>20-r</sub>-Y<sub>80</sub>)

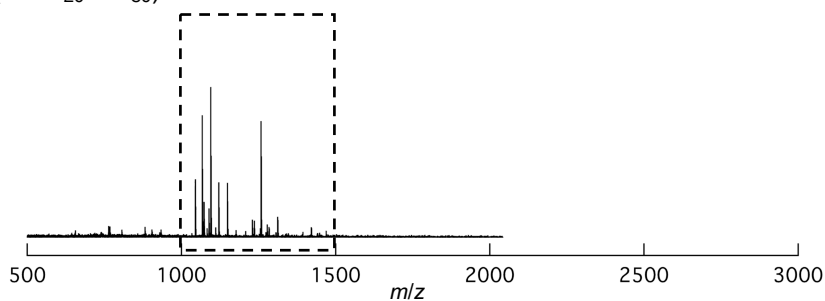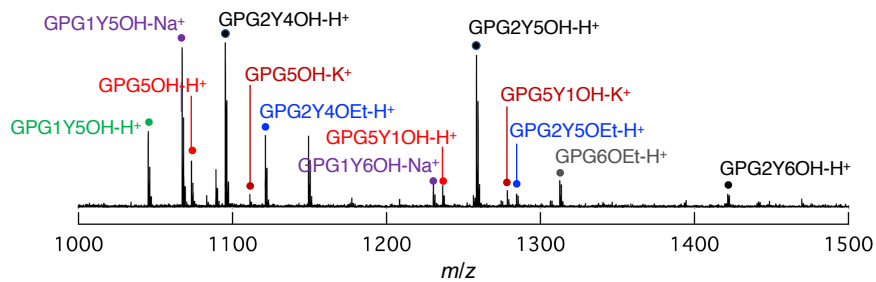

| Additive: H <sup>+</sup> (●) |                         | Additive: Na <sup>+</sup> (●) |                          |                          |
|------------------------------|-------------------------|-------------------------------|--------------------------|--------------------------|
| m                            | 5                       | n                             | 6                        |                          |
| code                         | GPG1Y5OH-H <sup>+</sup> | code                          | GPG1Y5OH-Na <sup>+</sup> | GPG1Y6OH-Na <sup>+</sup> |
| Theo.                        | 1046.06                 | Theo.                         | 1068.05                  | 1231.24                  |
| Obsd.                        | 1045.38                 | Obsd.                         | 1067.35                  | 1230.41                  |



**R = H, Additive: H<sup>+</sup> (●)**

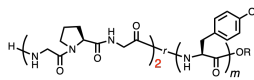

| m     | 4                       | 5                       | 6                       |
|-------|-------------------------|-------------------------|-------------------------|
| code  | GPG2Y4OH-H <sup>+</sup> | GPG2Y5OH-H <sup>+</sup> | GPG2Y6OH-H <sup>+</sup> |
| Theo. | 1093.98                 | 1257.17                 | 1420.36                 |
| Obsd. | 1095.39                 | 1258.44                 | 1421.50                 |

**R = C<sub>2</sub>H<sub>5</sub>, Additive: H<sup>+</sup> (●)**

| n     | 4                        | 5                        |
|-------|--------------------------|--------------------------|
| code  | GPG2Y4OEt-H <sup>+</sup> | GPG2Y5OEt-H <sup>+</sup> |
| Theo. | 1122.01                  | 1285.20                  |
| Obsd. | 1121.40                  | 1284.46                  |

**Additive: H<sup>+</sup> (●)**

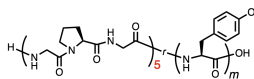

| m     | 0                     | 1                       |
|-------|-----------------------|-------------------------|
| code  | GPG5OH-H <sup>+</sup> | GPG5Y1OH-H <sup>+</sup> |
| Theo. | 1074.55               | 1237.74                 |
| Obsd. | 1073.40               | 1236.47                 |

**Additive: K<sup>+</sup> (●)**

| m     | 0                     | 1                       |
|-------|-----------------------|-------------------------|
| code  | GPG5OH-H <sup>+</sup> | GPG5Y1OH-H <sup>+</sup> |
| Theo. | 1112.65               | 1275.84                 |
| Obsd. | 1111.37               | 1278.43                 |

**Additive: H<sup>+</sup> (●)**

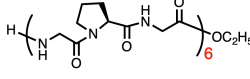

| m     | 0                      |
|-------|------------------------|
| code  | GPG6OEt-H <sup>+</sup> |
| Theo. | 1313.69                |
| Obsd. | 1312.51                |

(j) Poly(GPG<sub>10-r</sub>-Y<sub>90</sub>)

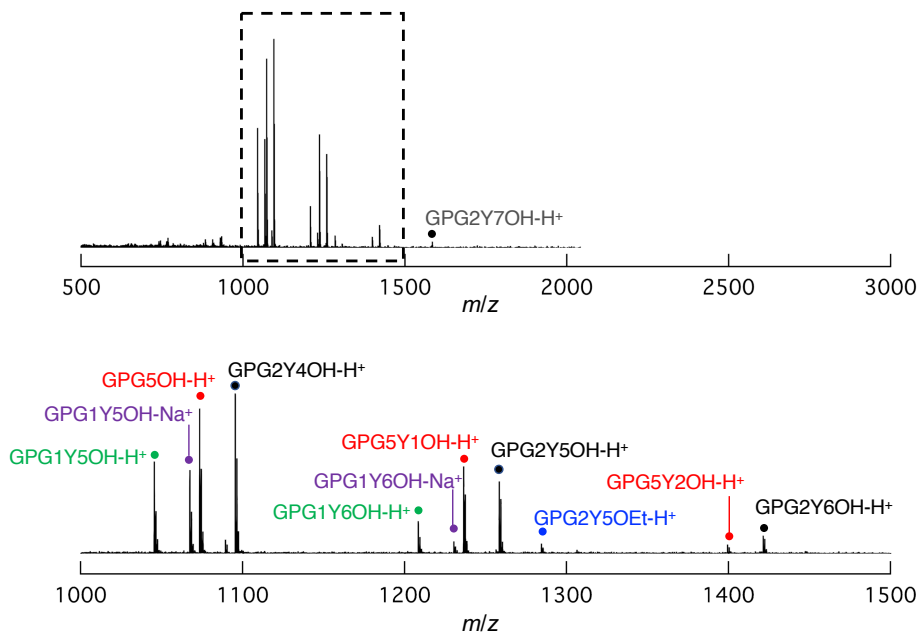

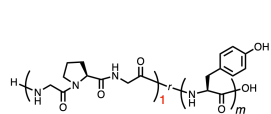

Additive: H<sup>+</sup> (●)

| m     | 5                       | 6                       |
|-------|-------------------------|-------------------------|
| code  | GPG1Y5OH-H <sup>+</sup> | GPG1Y6OH-H <sup>+</sup> |
| Theo. | 1046.06                 | 1209.25                 |
| Obsd. | 1045.21                 | 1208.23                 |

Additive: Na<sup>+</sup> (●)

| n     | 5                        | 6                        |
|-------|--------------------------|--------------------------|
| code  | GPG1Y5OH-Na <sup>+</sup> | GPG1Y6OH-Na <sup>+</sup> |
| Theo. | 1068.05                  | 1231.24                  |
| Obsd. | 1067.19                  | 1230.23                  |

R = H, Additive: H<sup>+</sup> (●)

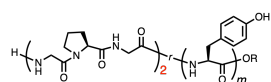

| m     | 4                       | 5                       | 6                       |
|-------|-------------------------|-------------------------|-------------------------|
| code  | GPG2Y4OH-H <sup>+</sup> | GPG2Y5OH-H <sup>+</sup> | GPG2Y6OH-H <sup>+</sup> |
| Theo. | 1093.98                 | 1257.17                 | 1420.36                 |
| Obsd. | 1095.21                 | 1258.25                 | 1421.29                 |

R = C<sub>2</sub>H<sub>5</sub>, Additive: H<sup>+</sup> (●)

| n     | 5                        |
|-------|--------------------------|
| code  | GPG2Y5OEt-H <sup>+</sup> |
| Theo. | 1285.20                  |
| Obsd. | 1284.27                  |

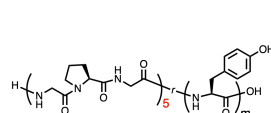

Additive: H<sup>+</sup> (●)

| m     | 0                     | 1                       | 2                       |
|-------|-----------------------|-------------------------|-------------------------|
| code  | GPG5OH-H <sup>+</sup> | GPG5Y1OH-H <sup>+</sup> | GPG5Y2OH-H <sup>+</sup> |
| Theo. | 1074.55               | 1237.74                 | 1400.93                 |
| Obsd. | 1073.24               | 1236.26                 | 1399.28                 |

(j) Poly(Y<sub>100</sub>)

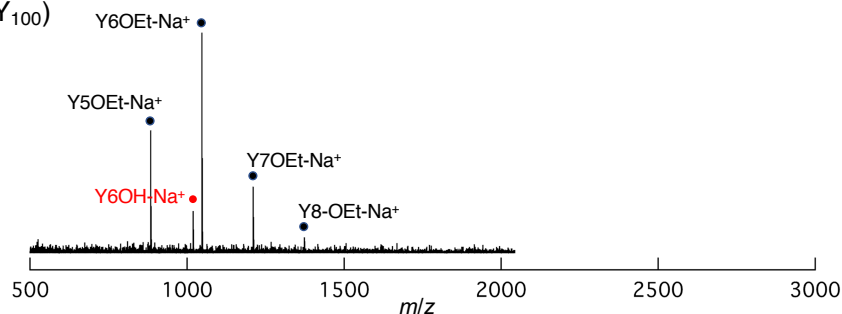

R = C<sub>2</sub>H<sub>5</sub>, Additive: Na<sup>+</sup> (●)

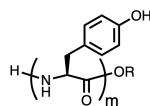

| m     | 5                     | 6                     | 7                     | 8                     |
|-------|-----------------------|-----------------------|-----------------------|-----------------------|
| code  | Y5OEt-Na <sup>+</sup> | Y6OEt-Na <sup>+</sup> | Y7OEt-Na <sup>+</sup> | Y8OEt-Na <sup>+</sup> |
| Theo. | 885.00                | 1048.19               | 1211.38               | 1374.57               |
| Obsd. | 884.10                | 1047.12               | 1210.14               | 1373.16               |

R = H, Additive: Na<sup>+</sup> (●)

| m     | 6                    |
|-------|----------------------|
| code  | Y6OH-Na <sup>+</sup> |
| Theo. | 1020.13              |
| Obsd. | 1019.10              |

**Figure S2.** MALDI-TOF MS of poly(GPG<sub>n</sub>-*r*-Y<sub>m</sub>) (matrix: dithranol, mode: positive reflectron). The peaks were assigned with the label “GPG<sub>n</sub>Y<sub>m</sub>OR-Additive”, where n, m, R, and Additive represent the repeating number of GPG unit, that of Y unit, C-terminal structure (H or Et), and adducted cation (H<sup>+</sup> or Na<sup>+</sup> or K<sup>+</sup>), respectively.

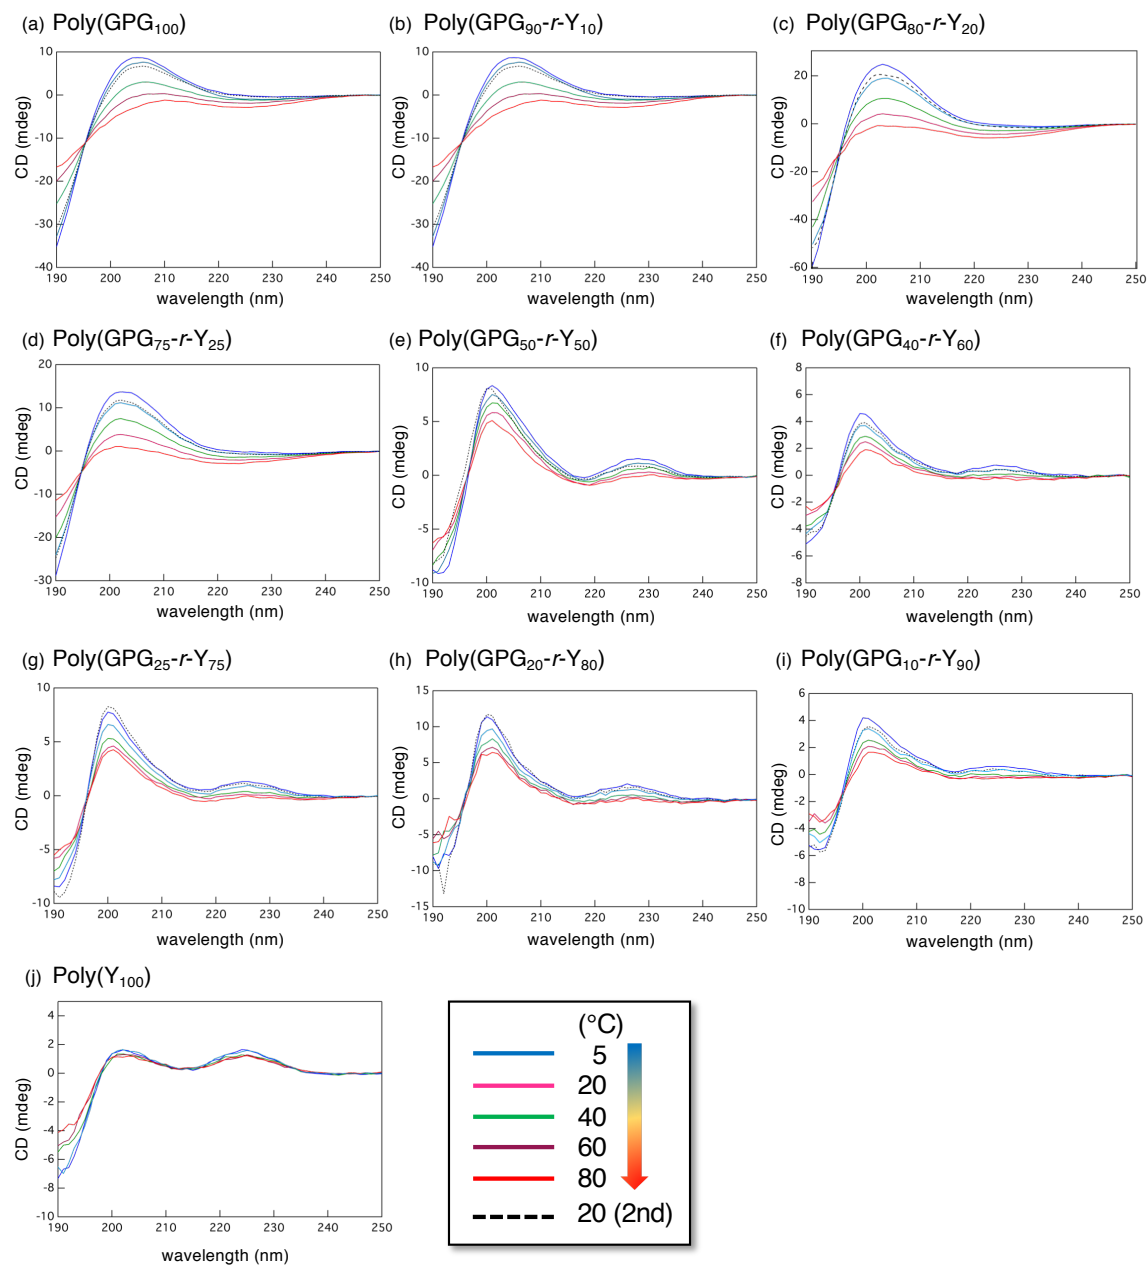

**Figure S3.** CD spectra of poly(GPG<sub>n</sub>-r-Y<sub>m</sub>) at various temperatures in 2,2,2-trifluoroethanol (TFE).

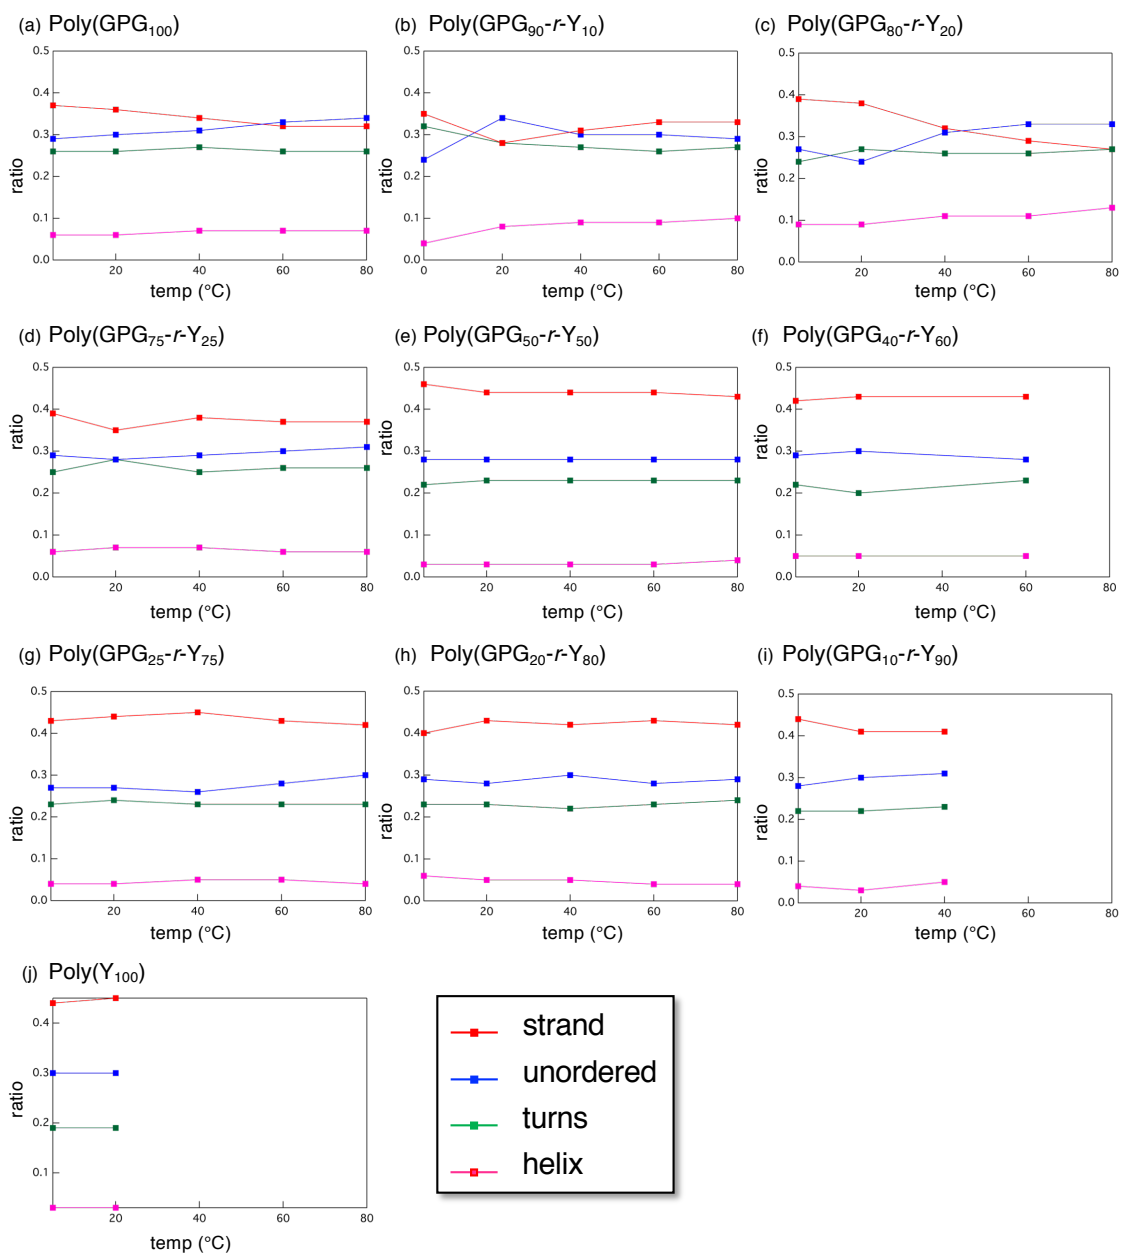

**Figure S4.** The contents of secondary structures of poly(GPG<sub>n</sub>-r-Y<sub>m</sub>) at various temperatures. They were calculated by DichroWeb online CD analysis server using CDSSTR algorithm in combination with reference data set 4.

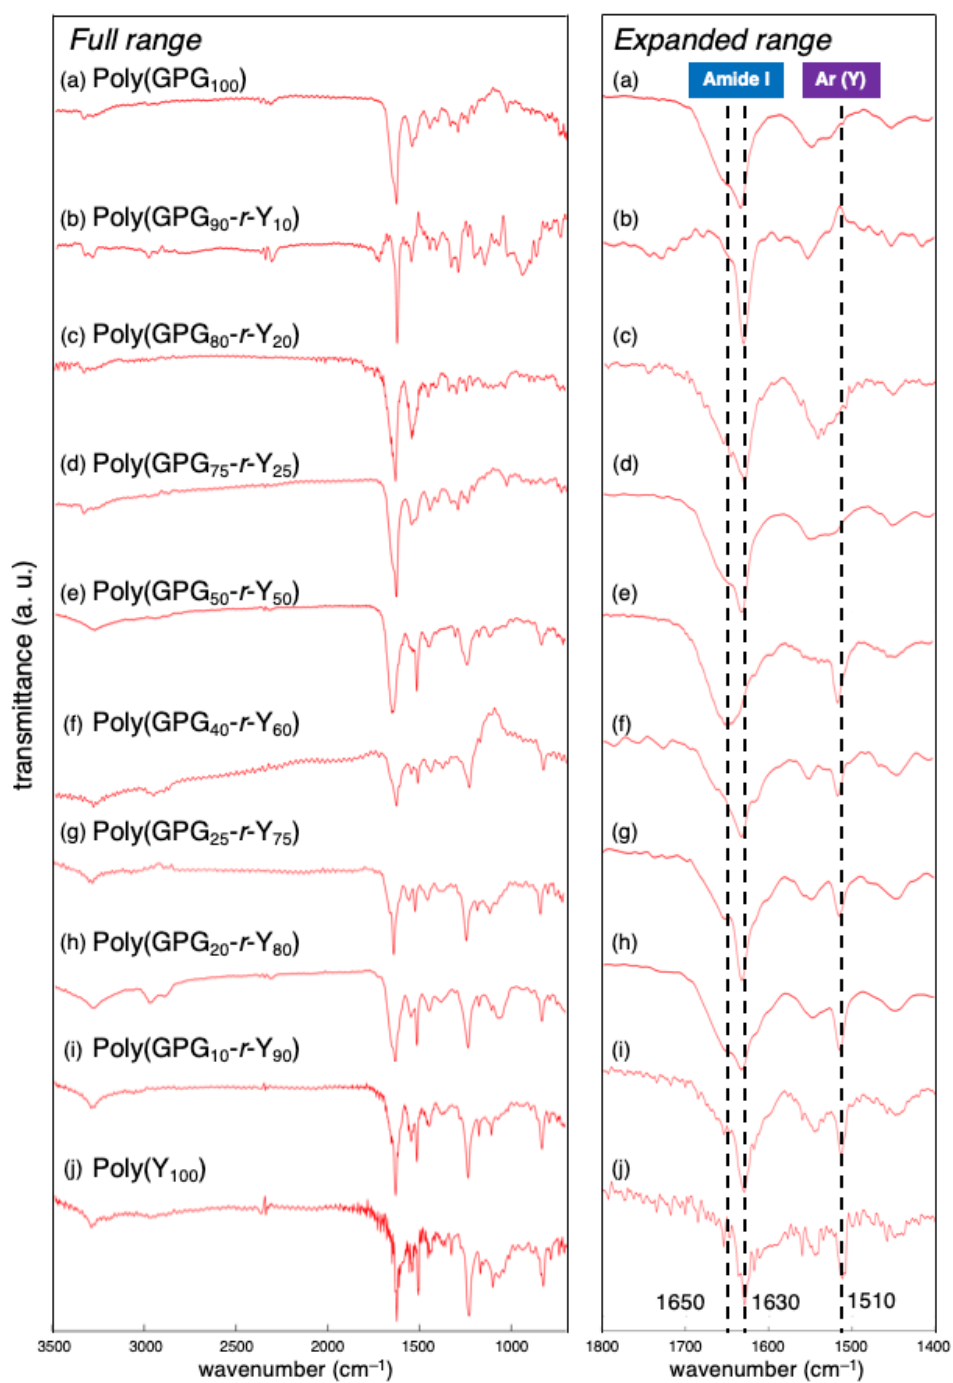

**Figure S5.** ATR-FT-IR spectra of poly(GPG<sub>n</sub>-r-Y<sub>m</sub>). Amide I absorptions of 1650 and 1630 cm<sup>-1</sup> are corresponded to the peaks of random and  $\beta$ -sheet structures, respectively.

(a) Poly(GPG<sub>80</sub>-*r*-Y<sub>20</sub>)

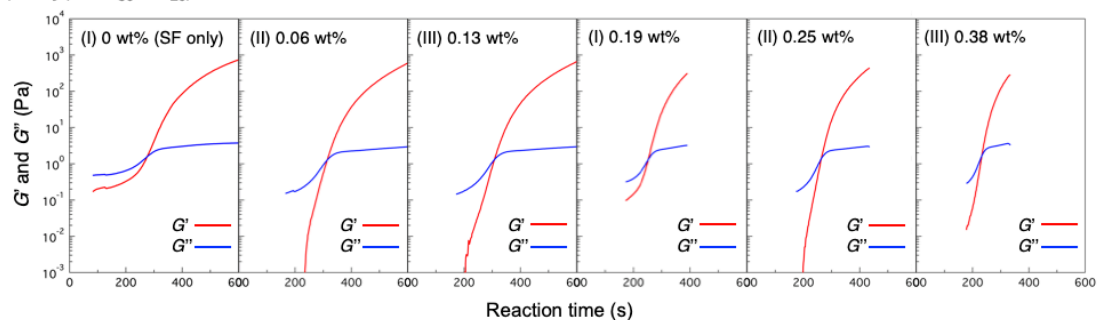

(b) Poly(GPG<sub>40</sub>-*r*-Y<sub>60</sub>)

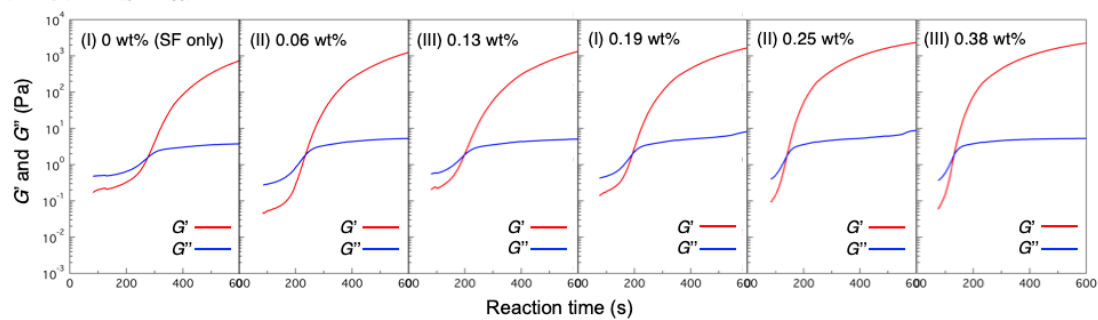

(c) Poly(GPG<sub>20</sub>-*r*-Y<sub>80</sub>)

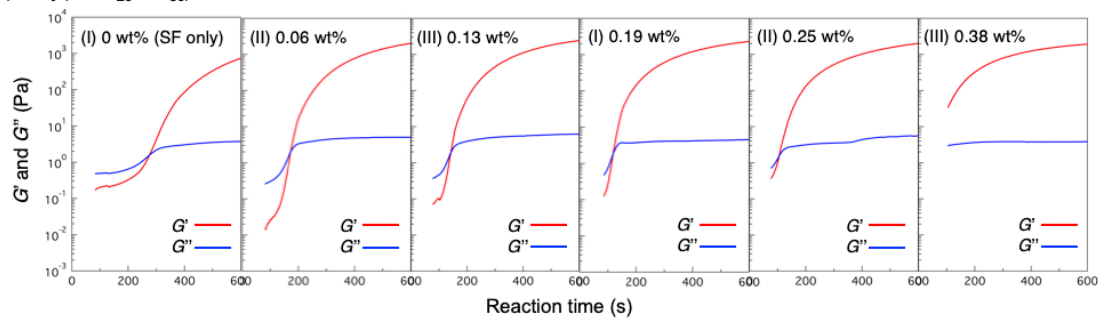

**Figure S6.** Time-dependent  $G'$  and  $G''$  during the gelation of SF solution using poly(GPG<sub>*n*</sub>-*r*-Y<sub>*m*</sub>) crosslinker.

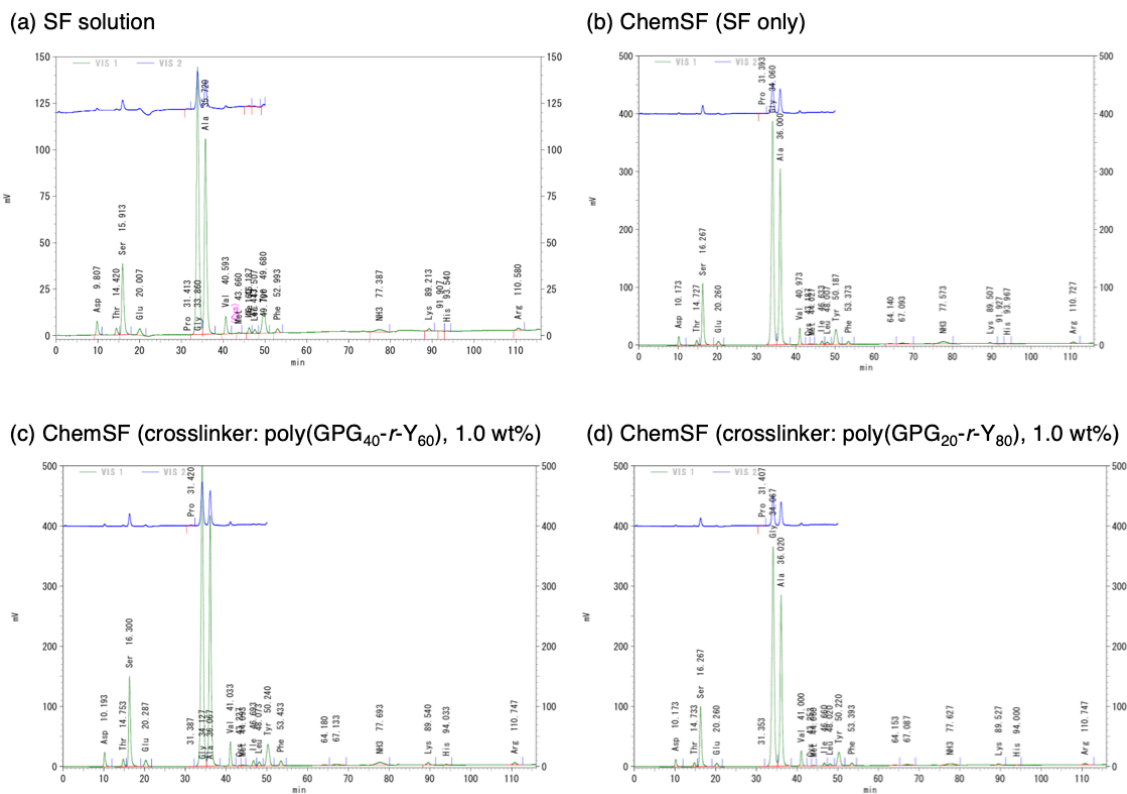

**Figure S7.** Amino acid analysis data by HPLC. The calculated ratio of each amino acid was shown in Table S3.

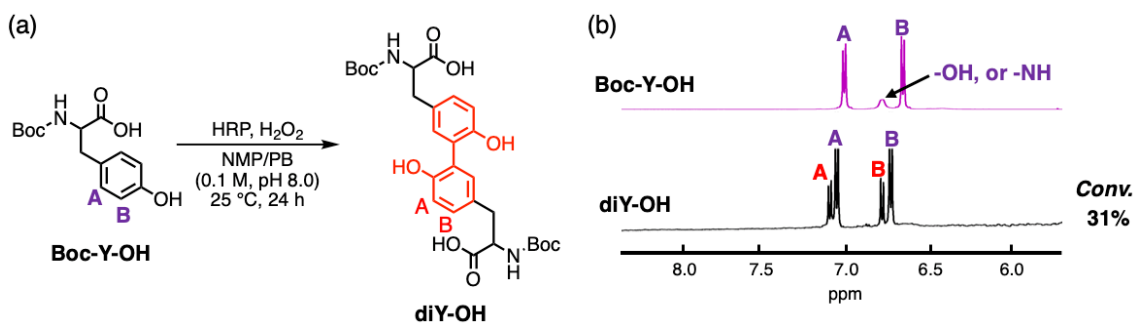

**Figure S8.** (a) Model enzymatic reaction using Boc-Y-OH. (b) partial <sup>1</sup>H NMR of Boc-Y-OH and diY-OH. (500 MHz, DMSO-d<sub>6</sub>).

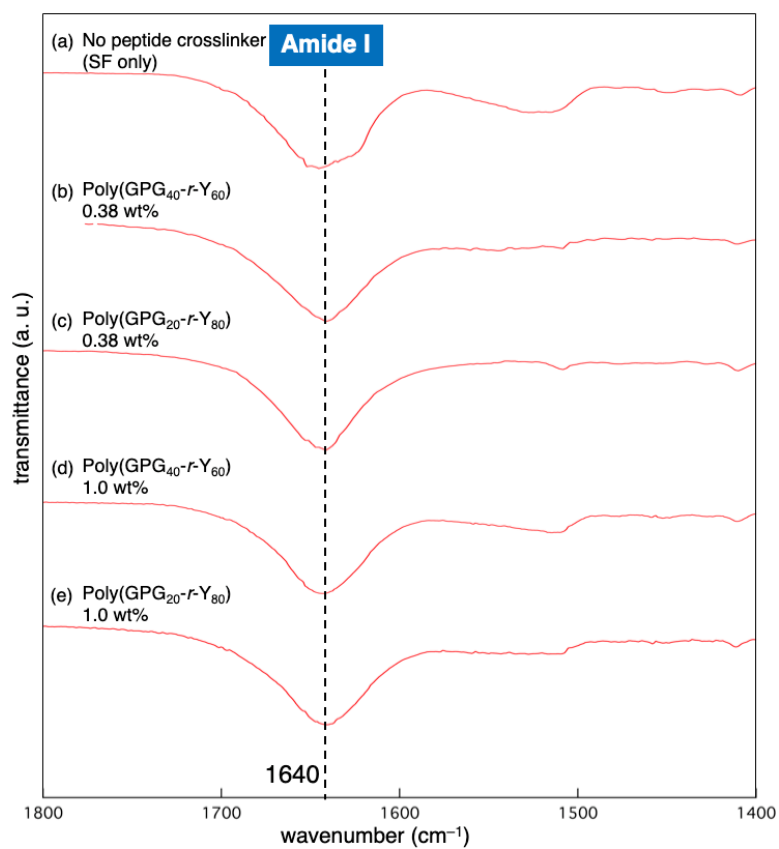

**Figure S9.** ATR-FT-IR spectra of ChemSF prepared with poly(GPG<sub>*n*</sub>-*r*-Y<sub>*m*</sub>) crosslinker.



(a) Poly(GPG<sub>40</sub>-*r*-Y<sub>60</sub>)

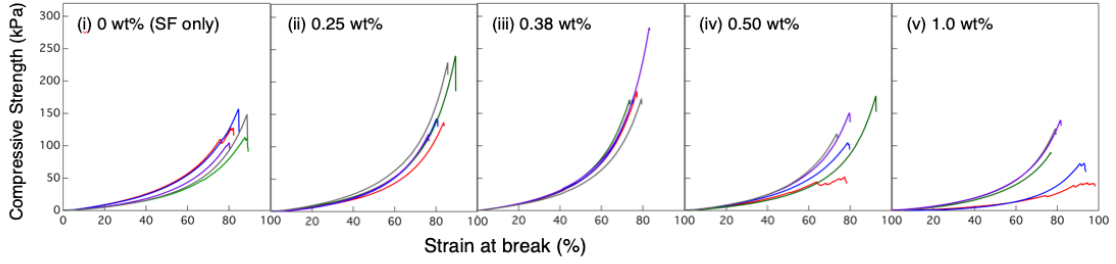

(b) Poly(GPG<sub>20</sub>-*r*-Y<sub>80</sub>)

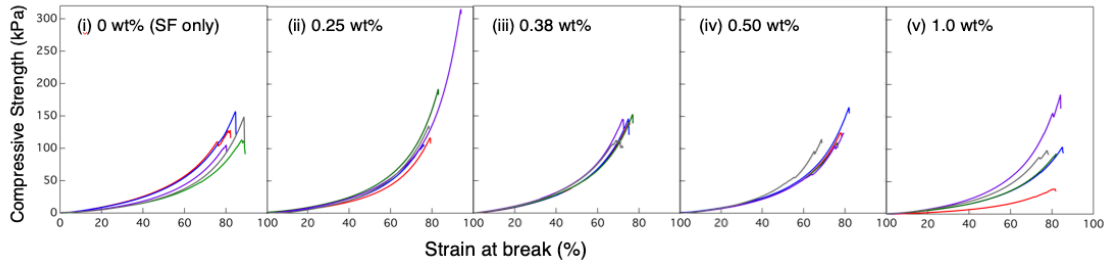

**Figure S10.** Stress-strain curves of ChemSF samples obtained by using poly(GPG<sub>*n*</sub>-*r*-Y<sub>*m*</sub>) crosslinker. The compression rate: 10 mm/min.

(a) Poly(GPG<sub>40</sub>-*r*-Y<sub>60</sub>)

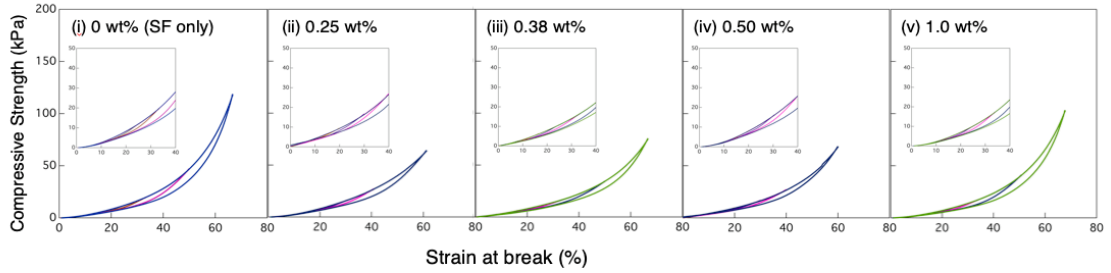

(b) Poly(GPG<sub>20</sub>-*r*-Y<sub>80</sub>)

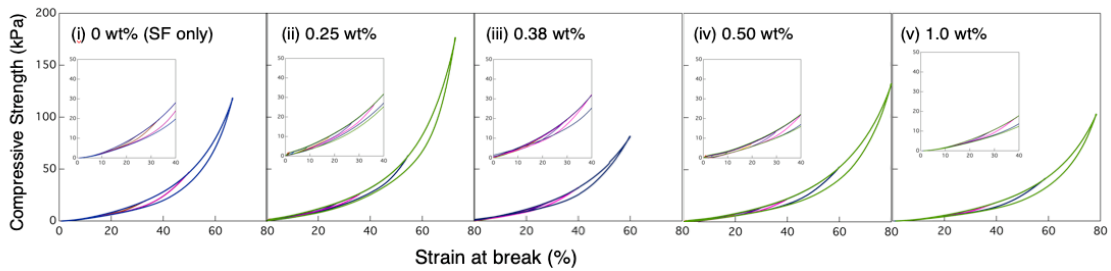

**Figure S11.** Stress-strain curves of cyclic tests on ChemSF samples obtained by using Poly(GPG<sub>*n*</sub>-*r*-Y<sub>*m*</sub>) crosslinker (inset: magnified range). The loading and unloading rate: 10 mm/min.

**Table S1.** Total monomer concentration and papain concentration effects for the chemoenzymatic copolymerization of GPG and Y

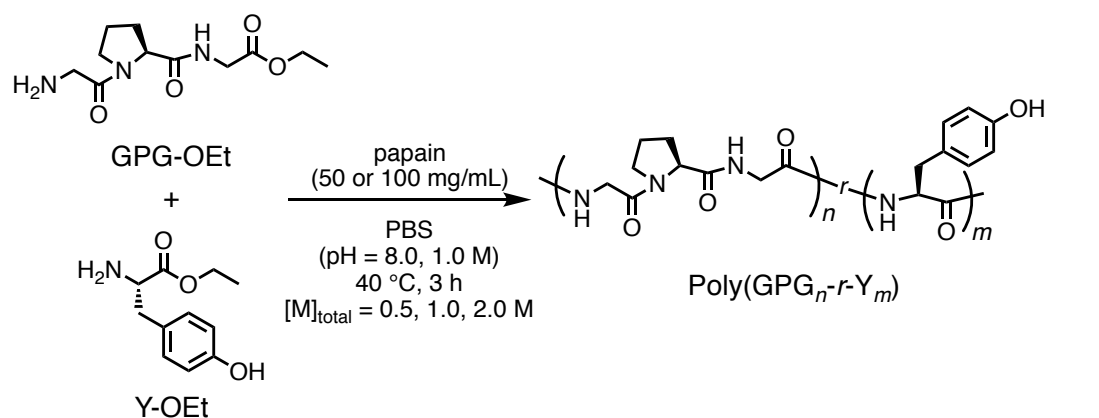

| run | monomer (%) |    | $[M]_{\text{total}}$<br>(M) | papain<br>conc.<br>(mg/mL) | yield<br>(%) <sup>a</sup> | $M_p^b$        | composition (%) <sup>c</sup> |                |
|-----|-------------|----|-----------------------------|----------------------------|---------------------------|----------------|------------------------------|----------------|
|     | GPG         | Y  |                             |                            |                           |                | GPG                          | Y              |
| 1   |             |    | 2.0                         | 100                        | 10                        | 1100           | 89                           | 11             |
| 2   |             |    | 2.0                         | 50                         | 6                         | 1100           | 88                           | 12             |
| 3   | 80          | 20 | 1.0                         | 100                        | 16                        | 1300           | 90                           | 10             |
| 4   |             |    | 1.0                         | 50                         | 11                        | 1100           | 90                           | 10             |
| 5   |             |    | 0.5                         | 50                         | 5                         | 1100           | 87                           | 13             |
| 6   |             |    | 2.0                         | 100                        | – <sup>d</sup>            | – <sup>e</sup> | – <sup>e</sup>               | – <sup>e</sup> |
| 7   |             |    | 2.0                         | 50                         | – <sup>d</sup>            | – <sup>e</sup> | – <sup>e</sup>               | – <sup>e</sup> |
| 8   | 60          | 40 | 1.0                         | 100                        | 4                         | 1300           | 41                           | 59             |
| 9   |             |    | 1.0                         | 50                         | – <sup>d</sup>            | – <sup>e</sup> | – <sup>e</sup>               | – <sup>e</sup> |
| 10  |             |    | 0.5                         | 50                         | – <sup>d</sup>            | – <sup>e</sup> | – <sup>e</sup>               | – <sup>e</sup> |
| 11  |             |    | 2.0                         | 100                        | 3                         | – <sup>e</sup> | 21                           | 77             |
| 12  |             |    | 2.0                         | 50                         | – <sup>d</sup>            | – <sup>e</sup> | – <sup>e</sup>               | – <sup>e</sup> |
| 13  | 40          | 60 | 1.0                         | 100                        | 12                        | 1100           | 36                           | 64             |
| 14  |             |    | 1.0                         | 50                         | 15                        | 1100           | 29                           | 71             |
| 15  |             |    | 0.5                         | 50                         | 23                        | 1100           | 2                            | 98             |

<sup>a</sup>H<sub>2</sub>O-insoluble part. <sup>b</sup>Detected by MALDI-TOF MS. <sup>c</sup>Measured by <sup>1</sup>H NMR. <sup>d</sup>No precipitate was formed. <sup>e</sup>Not determined.

**Table S2.** Chemoenzymatic homopolymerization of GPG using several enzymes

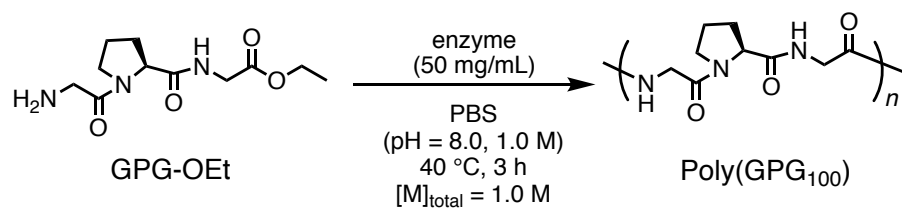

| run | enzyme       | conc. (mg/mL) | Yield (%)       | $M_p^c$ |
|-----|--------------|---------------|-----------------|---------|
| 1   | papain       | 50            | 39 <sup>a</sup> | 1300    |
| 2   | bromelain    | 10            | 17 <sup>a</sup> | 1300    |
| 3   | bromelain    | 50            | 22 <sup>a</sup> | 1100    |
| 12  | proteinase K | 10            | 33 <sup>b</sup> | 800     |
| 13  | proteinase K | 5             | 28 <sup>b</sup> | 800     |
| 15  | proteinase K | 2             | 30 <sup>b</sup> | 800     |

<sup>a</sup>H<sub>2</sub>O-insoluble part. <sup>b</sup>Obtained from H<sub>2</sub>O-soluble part by dialysis. <sup>c</sup>Detected by MALDI-TOF MS.

**Table S3.** Calculated secondary structures of poly(GPG<sub>*n-r*</sub>-Y<sub>*m*</sub>)

| code                                        | Structure (%) <sup>a</sup> |                 |               |           |
|---------------------------------------------|----------------------------|-----------------|---------------|-----------|
|                                             | $\alpha$ -helix            | $\beta$ -strand | $\beta$ -turn | unordered |
| Poly(GPG <sub>100</sub> )                   | 6                          | 37              | 26            | 29        |
| Poly(GPG <sub>90-r</sub> -Y <sub>10</sub> ) | 8                          | 34              | 28            | 28        |
| Poly(GPG <sub>80-r</sub> -Y <sub>20</sub> ) | 9                          | 38              | 27            | 24        |
| Poly(GPG <sub>75-r</sub> -Y <sub>25</sub> ) | 7                          | 35              | 28            | 28        |
| Poly(GPG <sub>50-r</sub> -Y <sub>50</sub> ) | 3                          | 44              | 23            | 28        |
| Poly(GPG <sub>40-r</sub> -Y <sub>60</sub> ) | 5                          | 46              | 20            | 30        |
| Poly(GPG <sub>25-r</sub> -Y <sub>75</sub> ) | 6                          | 44              | 24            | 26        |
| Poly(GPG <sub>20-r</sub> -Y <sub>80</sub> ) | 5                          | 43              | 23            | 28        |
| Poly(GPG <sub>10-r</sub> -Y <sub>90</sub> ) | 3                          | 41              | 22            | 30        |
| Poly(Y <sub>100</sub> )                     | 3                          | 45              | 19            | 30        |

<sup>a</sup>The content was calculated by using CDSSTR algorithm in combination with reference data set 4.

**Table S4.** Amino acid analysis of ChemSF

| A. A.           | Content (%)  |              |              |              |
|-----------------|--------------|--------------|--------------|--------------|
|                 | entry 1      | entry 2      | entry 3      | entry 4      |
| Asp             | 1.84         | 1.34         | 1.51         | 1.14         |
| Thr             | 0.96         | 0.78         | 0.86         | 0.69         |
| <b>Ser</b>      | <b>10.47</b> | <b>10.27</b> | <b>10.42</b> | <b>10.39</b> |
| Glu             | 1.39         | 0.95         | 1.09         | 0.82         |
| <b>Gly</b>      | <b>43.33</b> | <b>45.10</b> | <b>44.61</b> | <b>46.02</b> |
| Ala             | 28.69        | 29.84        | 29.62        | 30.17        |
| Val             | 2.30         | 2.19         | 2.20         | 2.10         |
| Cys             | 0.00         | 0.03         | 0.02         | 0.01         |
| Met             | 0.09         | 0.06         | 0.07         | 0.05         |
| Ile             | 0.74         | 0.51         | 0.59         | 0.48         |
| Leu             | 0.58         | 0.46         | 0.53         | 0.44         |
| <b>Tyr</b>      | <b>5.07</b>  | <b>3.78</b>  | <b>3.74</b>  | <b>3.56</b>  |
| Phe             | 0.68         | 0.61         | 0.68         | 0.58         |
| NH <sub>3</sub> | 2.64         | 2.96         | 2.63         | 2.41         |
| Lys             | 0.35         | 0.24         | 0.37         | 0.28         |
| His             | 0.07         | 0.09         | 0.13         | 0.09         |
| Arg             | 0.49         | 0.41         | 0.46         | 0.40         |
| <b>Pro</b>      | <b>0.32</b>  | <b>0.39</b>  | <b>0.44</b>  | <b>0.37</b>  |

Entry 1: SF solution, entry 2: ChemSF without poly(GPG<sub>*n-r*</sub>-Y<sub>*m*</sub>) (SF only), entry 3: ChemSF with 1 wt% of poly(GPG<sub>40-*r*</sub>-Y<sub>60</sub>), entry 4: ChemSF with 1 wt% of poly(GPG<sub>20-*r*</sub>-Y<sub>80</sub>).
